# Supplementary material
Source: PubMed Central journal article supplement (PMC2148270)

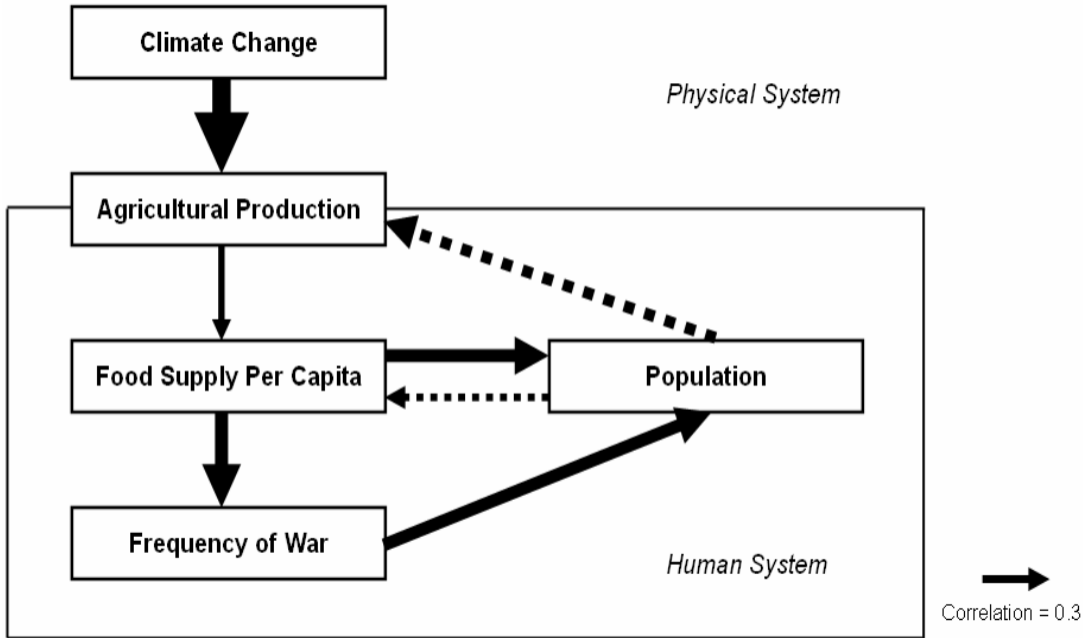

Supplement: pnas_0703073104_1.pdf [file pnas_0703073104_1.pdf]

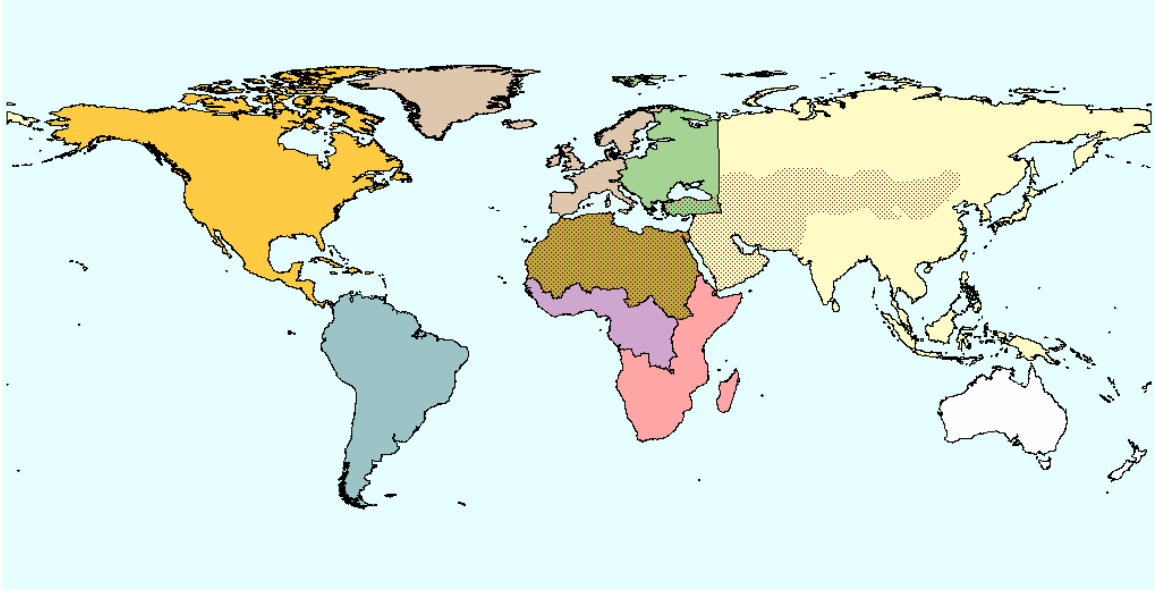

Supplement: pnas_0703073104_2.pdf [file pnas_0703073104_2.pdf]

**A**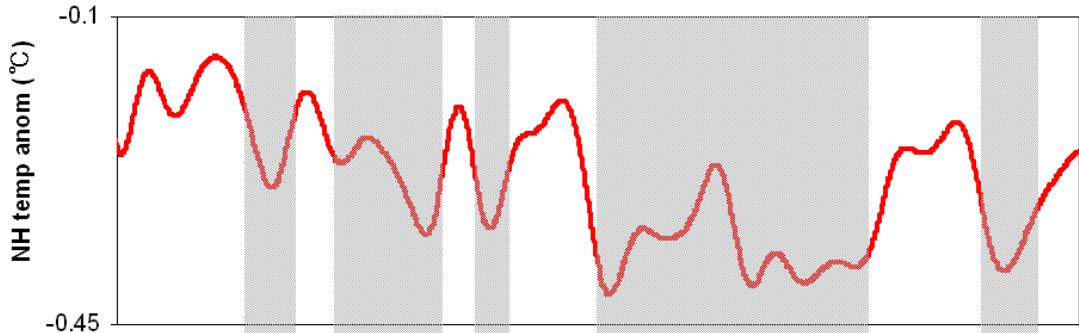**B**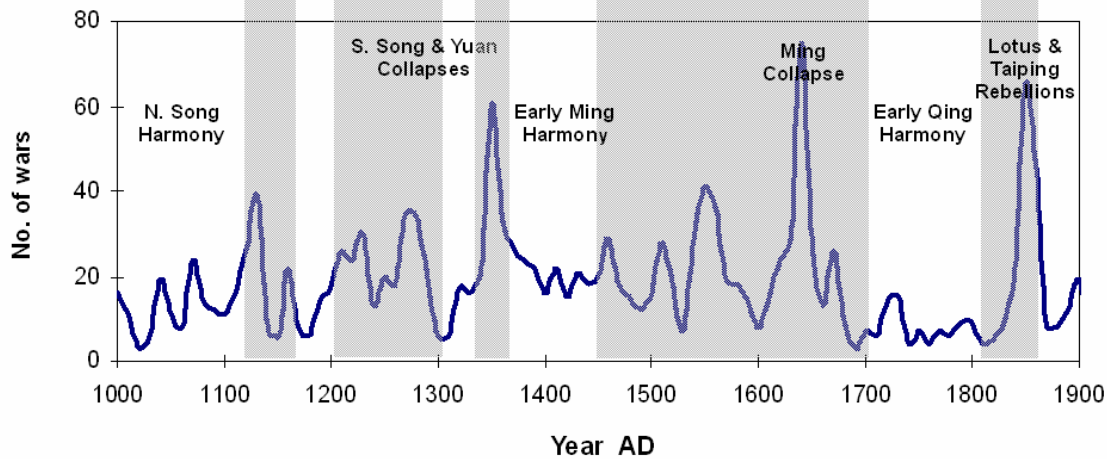

Supplement: pnas_0703073104_3.pdf [file pnas_0703073104_3.pdf]

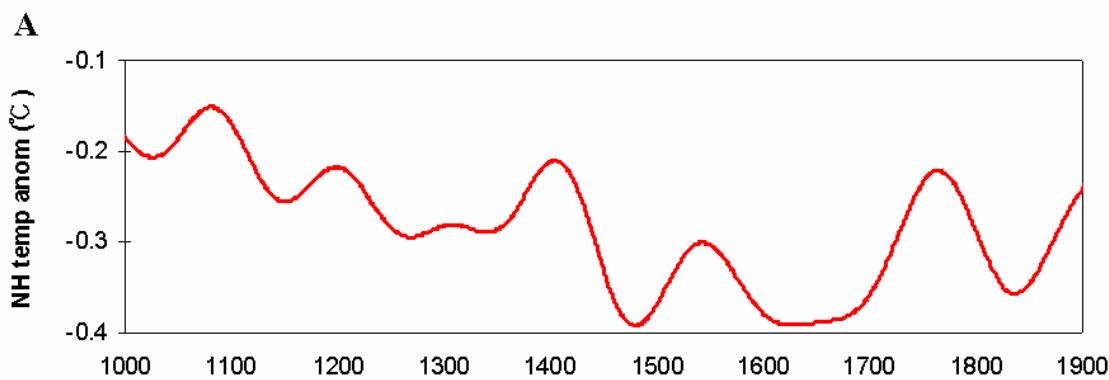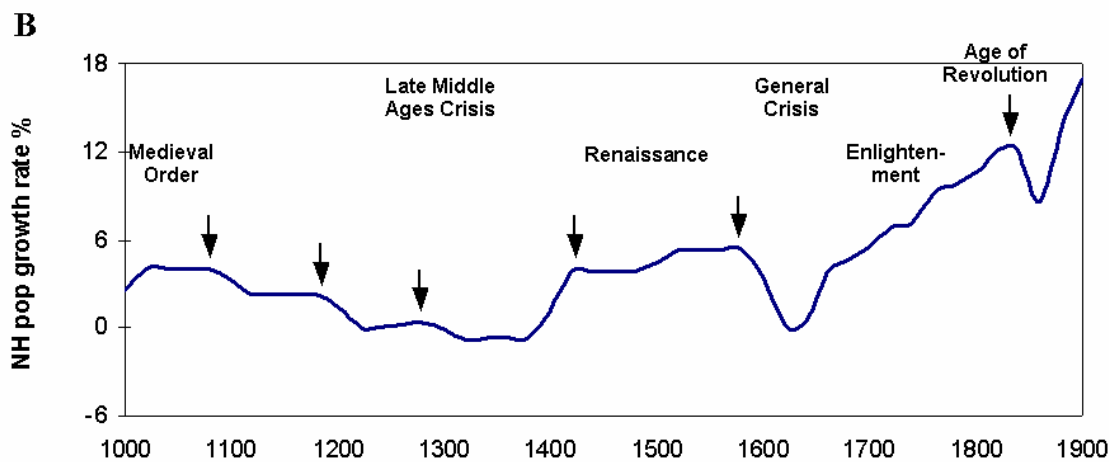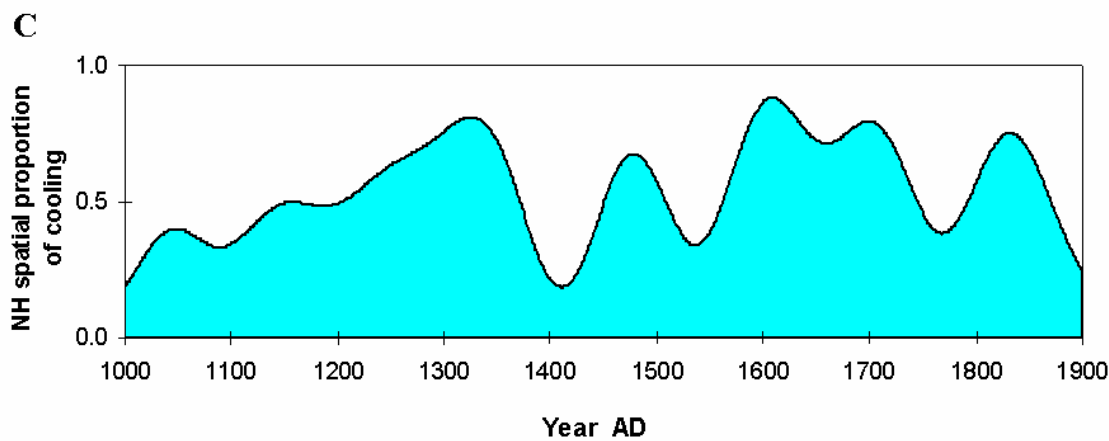

Supplement: pnas_0703073104_4.pdf [file pnas_0703073104_4.pdf]
